# Supplementary material for: Protein Binder (ProBi) as a New Class of Structurally Robust Non-Antibody Protein Scaffold for Directed Evolution
Source: PubMed Central journal article supplement (PMC7911045; doi:10.3390/v13020190), 2021-01-27
Supplement: viruses-13-00190-s001.pdf [file viruses-13-00190-s001.pdf]

# **Protein binder (ProBi) as a new class of structurally robust non-antibody protein scaffolds for directed evolution**

Phuong Ngoc Pham<sup>#</sup>, Maroš Huličiak<sup>#</sup>, Lada Biedermannová, Jiří Černý, Tatsiana Charnavets, Gustavo Fuertes, Štěpán Herynek, Lucie Kolářová, Petr Kolenko, Jiří Pavlíček, Jiří Zahradník, Pavel Mikulecky\*, and Bohdan Schneider\*

Institute of Biotechnology of the Czech Academy of Sciences, BIOCEV, CZ-25250, Vestec, Czech Republic

(<sup>#</sup>) These authors contributed equally.

(\*) Corresponding authors

## Supporting Information

**Table S1.** List of primers.

| Name              | Sequence                                     |
|-------------------|----------------------------------------------|
| ProBi-cloning-for | AAGTCCATGGCACAGGGACCCGGG                     |
| ProBi-cloning-rev | GTTCCGATCCGATGGAGCCCATGAATG                  |
| T7b               | ATACGAAATTAATACGACTCACTATAGGGAGACCACAACGG    |
| TolAk             | CCGCACACCAGTAAGGTGTGCGGTTTCAGTTGCCGCTTTCTTCT |

**Table S2.** Data processing statistics and structure refinement parameters. Values in parentheses refer to the highest resolution shell.

| PDB code                                                                     | 7AVC                                 |
|------------------------------------------------------------------------------|--------------------------------------|
| Wavelength (Å)                                                               | 0.91841                              |
| Space group                                                                  | <i>H32</i>                           |
| Unit-cell parameters a, b, c (Å); $\alpha$ , $\beta$ , $\gamma$ (°)          | 72.7, 72.7, 192.8, 90.0, 90.0, 120.0 |
| Resolution range (Å)                                                         | 38.27 – 1.20 (1.22 – 1.20)           |
| No. of observations                                                          | 570,996 (14,200)                     |
| No. of unique reflections                                                    | 59,704 (2,225)                       |
| Data completeness (%)                                                        | 97.1 (74.4)                          |
| Average redundancy                                                           | 9.6 (6.4)                            |
| Average $I/\sigma(I)$                                                        | 5.4 (1.3)                            |
| $R_{\text{merge}}$                                                           | 0.242 (1.106)                        |
| $R_{\text{pim}}$                                                             | 0.117 (0.673)                        |
| $CC_{1/2}$                                                                   | 0.978 (0.498)                        |
| $R_{\text{work}}$                                                            | 0.135                                |
| $R_{\text{free}}$                                                            | 0.154                                |
| $R_{\text{all}}$                                                             | 0.140                                |
| Average B-factor (Å <sup>2</sup> )                                           | 17.0                                 |
| RMSD bond lengths from ideal (Å)                                             | 0.012                                |
| RMSD bond angles from ideal (°)                                              | 1.638                                |
| Number of non-hydrogen atoms                                                 | 1,403                                |
| Number of water molecules                                                    | 203                                  |
| Other molecules                                                              | 2x GOL, 1x Na <sup>+</sup>           |
| Ramachandran statistics: residues in favored regions (%); number of outliers | 100; 0                               |

**(A) pRDVsm cassette**

~TAATACGACTCACTATAGGGAGACCACAACGGTTTCCCAATAATTTTGTTTAACTTT  
 T7 promoter                      5' stem-loop                      RBS

AAGAAGGAGATATATCAT**ATG**GCATGGAGCCACCCGCAGTTCGAAAAGTCCATGGATA  
                                          NdeI                      Strep-tag II                      NcoI

TGGAATTATTCGGATCCGAACAAAAGCTTATTTCTGAAGAGGACTTGGGATCTGGTGG  
                                          BamHI                      c-Myc-tag

CCAGAAGCAA~  
 Tola

**(B) pETsm cassette**

~TAATACGACTCACTATAGGGGAATTGTGAGCGGATAACAATTCCCCTCTAGAAATAA  
 T7 promoter                      lac operator

TTTTGTTTAACTTTAAGAAGGAGATATACCAT**ATG**GCATGGAGCCACCCGCAGTTCGAA  
 RBS                                              NdeI                      Strep-tag II

AAGTCCATGGATATGGAATTATTCGGATCCGAACAAAAGCTTATTTCTGAAGAGGACT  
                                          NcoI                                              BamHI                      c-Myc-tag

TGTAATAG~  
*Stop codons*

**Figure S1.** DNA sequences of internal arrangement within (A) the pRDVsm and (B) pETsm vectors. A modified version of pRDV or pET-26b vectors containing the N-terminal Strep-tag, short multi cloning site, and C-terminal c-Myc-tag with a stop codon.

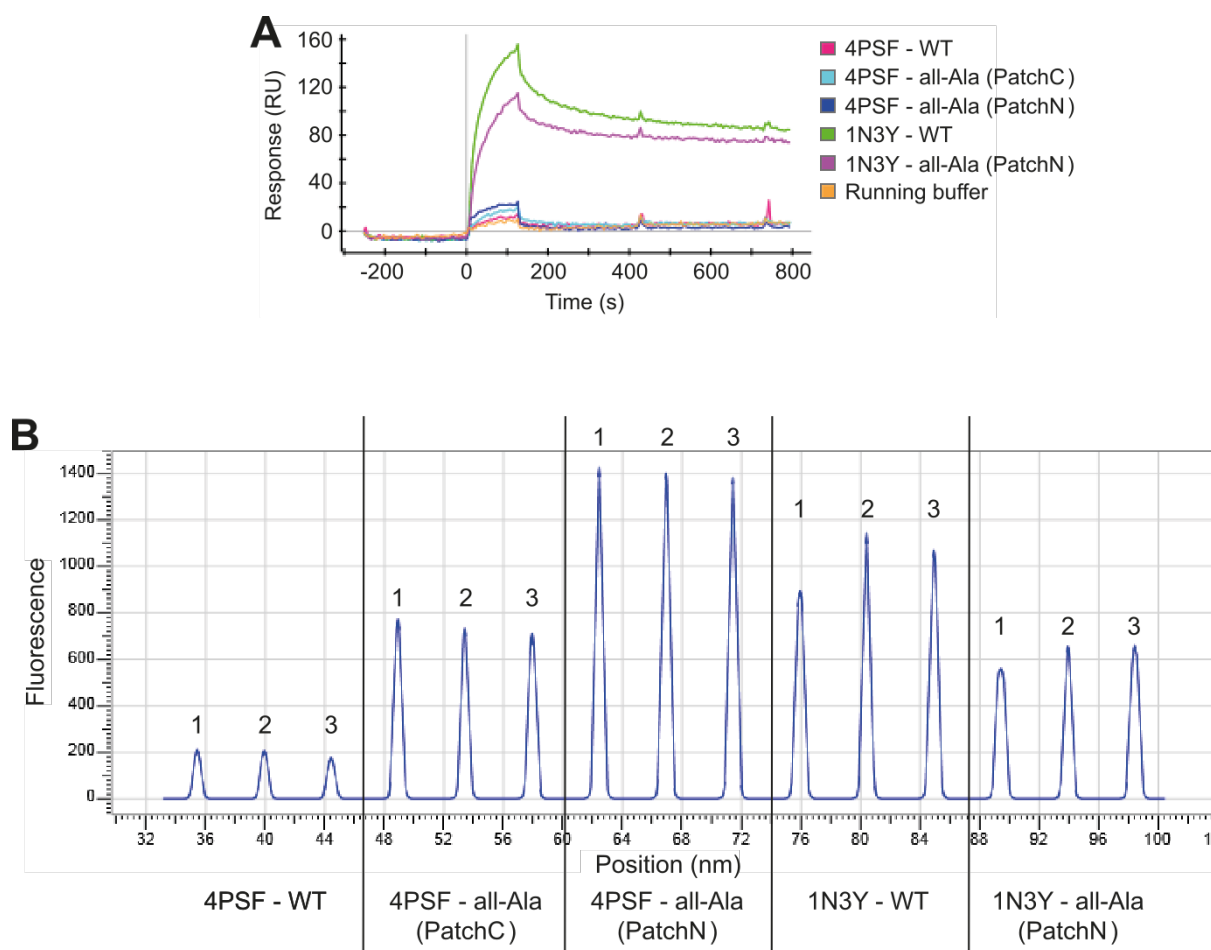

**Figure S2.** Testing of non-specific binding of scaffold candidates for (A) surface plasmon resonance (SPR) and (B) microscale thermophoresis (MST). Testing of SPR was performed on GLC chip. Testing of MST was done in three different types of capillaries – (1) Standard, (2) Hydrophilic, and (3) Hydrophobic.

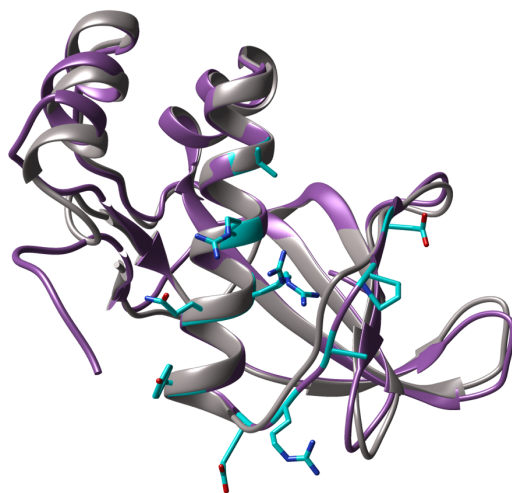

**Figure S3.** Structural alignment of the crystal structures of the J61 variant (violet ribbon) and the crystal structure of the WT (grey ribbon) of 4PSF. Mutated residues are highlighted in cyan and their side chains shown as sticks.

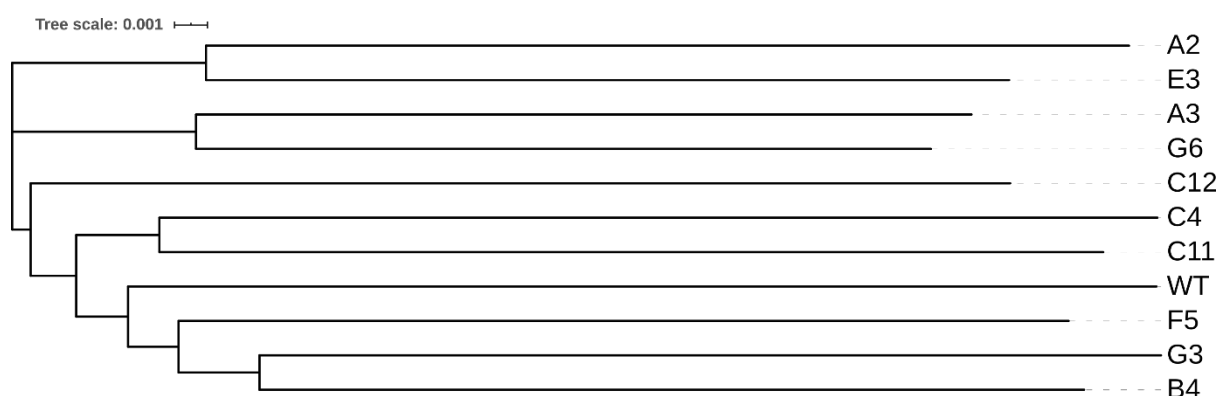

**Figure S4.** The phylogenetic tree of ten ProBi scaffold variants selected by ribosome display and used for more detailed biophysical characterization computed by multiple sequence alignment using EMBL-EBI Clustal Omega web service ([www.ebi.ac.uk/Tools/msa/clustalo](http://www.ebi.ac.uk/Tools/msa/clustalo)) with default parameters. Fasta-formatted sequences of the variants:

```

>WT
MAWSPQFEKSMAQGGPGQPGFCIKTNSSEGKVFINICHSPSIPPPADVTEEELLQMLEEDQAGFRIPMSLGEPHAELD
AKGQGCTAYDVAVNNSDFYRRMQNSDFLRRLVIRIAQRGIEFKYLLALNPRWIMMKNRPFMGSIGSEQKLISEEDL
>A3
MAWSPQFEKSMAQGGPGQPGFCIKTNSSEGKVFINICHSPSIPPPADVTEEELLQMLEEDQAGFRIPMSLGEPHAELD
AKGQGCTAYDVAVNNSDFYRRMQNSDFLRPLVIRIAVGGLEKRYGLSLPPLWRMMKNRPFMGSIGSEQKLISEEDL
>G6
MAWSPQFEKSMAQGGPGQPGFCIKTNSSEGKVFINICHSPSIPPPADVTEEELLQMLEEDQAGFRIPMSLGEPHAELD
AKGQGCTAYDVAVNNSDFYRRMQNSDFLRGLVIFIAVGGLESKYLLDLEPLWHMMKNRPFMGSIGSEQKLISEEDL
>C11
MAWSPQFEKSMAQGGPGQPGFCIKTNSSEGKVFINICHSPSIPPPADVTEEELLQMLEEDQAGFRIPMSLGEPHAELD
AKGQGCTAYDVAVNNSDFYRRMQNSDFLRLLVILIAIVGLEWKYPLPLVPLWEMMKNRPFMGSIGSEQKLISEEDL
>C12
MAWSPQFEKSMAQGGPGQPGFCIKTNSSEGKVFINICHSPSIPPPADVTEEELLQMLEEDQAGFRIPMSLGEPHAELD
AKGQGCTAYDVAVNNSDFYRRMQNSDFLRGLVIEIAPTGLEWKYFLLLEPSWCMMKNRPFMGSIGSEQKLISEEDL
>C4
MAWSPQFEKSMAQGGPGQPGFCIKTNSSEGKVFINICHSPSIPPPADVTEEELLQMLEEDQAGFRIPMSLGEPHAELD
AKGQGCTAYDVAVNNSDFYRRMQNSDFLRVLVILIALLGLEVKYRLALQPVWYMMKNRPFMGSIGSEQKLISEEDL
>A2
MAWSPQFEKSMAQGGPGQPGFCIKTNSSEGKVFINICHSPSIPPPADVTEEELLQMLEEDQAGFRIPMSLGEPHAELD
AKGQGCTAYDVAVNNSDFYRRMQNSDFLRGLVIRIAQRGIEFKYLLALNPRWIMMKNRPFMGSIGSEQKLISEEDL
>F5
MAWSPQFEKSMAQGGPGQPGFCIKTNSSEGKVFINICHSPSIPPPADVTEEELLQMLEEDQAGFRIPMSLGEPHAELD
AKGQGCTAYDVAVNNSDFYRRMQNSDFLRRLVITIALRGLELKYPLCLRPAWHMMKNRPFMGSIGSEQKLISEEDL
>G3
MAWSPQFEKSMAQGGPGQPGFCIKTNSSEGKVFINICHSPSIPPPADVTEEELLQMLEEDQAGFRIPMSLGEPHAELD
AKGQGCTAYDVAVNNSDFYRRMQNSDFLRRLVIAIAPNGLERKYTLHLTPTWSMMKNRPFMGSIGSEQKLISEEDL
>E3
MAWSPQFEKSMAQGGPGQPGFCIKTNSSEGKVFINICHSPSIPPPADVTEEELLQMLEEDQAGFRIPMSLGEPHAELD
AKGQGCTAYDVAVNNSDFYRRMQNSDFLRGLVIGIAHRGLESKYLRGPRWMMKNRPFMGSIGSEQKLISEEDL
>B4
MAWSPQFEKSMAQGGPGQPGFCIKTNSSEGKVFINICHSPSIPPPADVTEEELLQMLEEDQAGFRIPMSLGEPHAELD
AKGQGCTAYDVAVNNSDFYRRMQNSDFLRRLVIRIARTGLELKYSLNLWPPWSMMKNRPFMGSIGSEQKLISEEDL

```

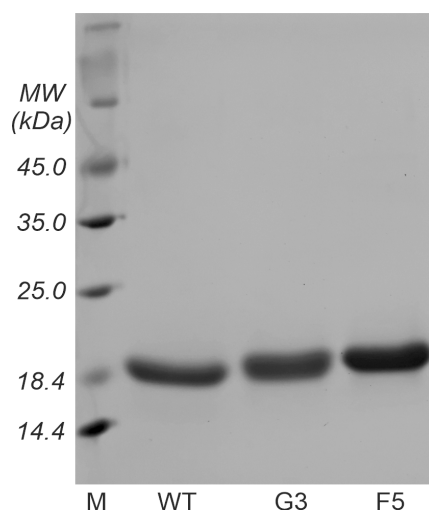

**Figure S5.** SDS-PAGE (15%) analysis of purified ProBi variants with the highest affinity measured by microscale thermophoresis (MST). We purified the proteins using the StrepTactinXT beads, followed by size exclusion chromatography.

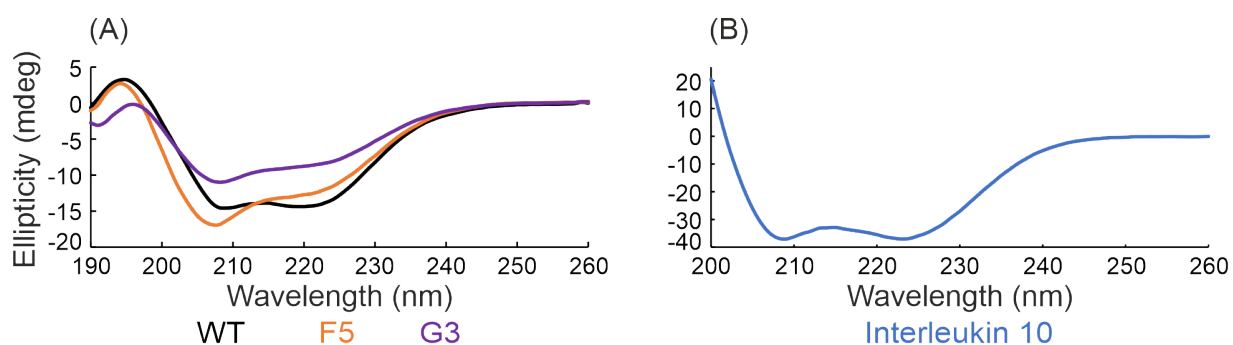

**Figure S6.** Circular dichroism spectra of (A) ProBi scaffold wild-type and two variants, and (B) interleukin-10. The CD spectra confirmed that all proteins were folded.

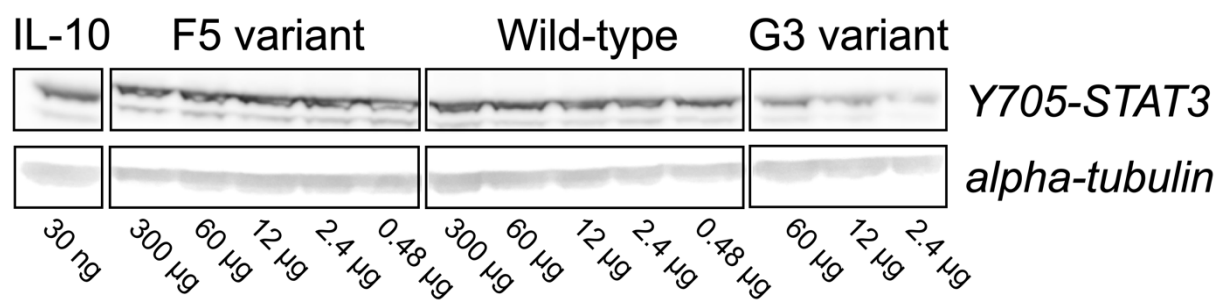

**Figure S7.** Inhibition of the IL-10 signaling pathway estimated by a competitive binding assay on the RAW264.7 cell line. The mixture contained IL-10 and a ProBi variant. The amount of IL-10 (30 ng) was the same in each well and the amount of ProBi proteins ranged from 300 μg to 0.48 μg. The ProBi variants with the highest affinity to IL-10, F5 and G3, showed no inhibition of the IL-10 signaling pathway on Western blot. We used the ProBi Wild-type protein as a negative control.
